# Supplementary material for: Analyzing solubility and diffusion of solvents in novel hybrid materials of poly(vinyl alcohol)/γ-aminopropyltriethoxysilane by inverse gas chromatography
Source: Royal Society of Chemistry journal article supplement (doi:10.1039/b709592a), 2007-01-01
Supplement: b709592a.pdf [file b709592a.pdf]

## Supplementary data

### Analyzing solubility and diffusion of solvents in novel hybrid materials of poly (vinyl alcohol)/ $\gamma$ -aminopropyltriethoxysilane by IGC

Qiu Gen Zhang, Qing Lin Liu\*, Jie Lin, Jian Hua Chen, Ai Mei Zhu

*Department of Chemical and Biochemical Engineering, College of Chemistry & Chemical Engineering, Xiamen*

*University, Xiamen, 361005, China. E-mail: ql Liu@xmu.edu.cn*

#### Part A: Calculation of solubility properties

Determination of the solubility of a solute based on IGC method depends on the measurement of retention times,  $t_R$  (min), of the solute flowing through a column packed with the polymer of interest. The  $t_R$  is related to the specific retention volume,  $V_g$  (cm<sup>3</sup>/g), by

$$V_g = (t_R - t_M) j F_0 \frac{273.2}{W_p T_{col}} \quad (1)$$

where  $t_M$  (min) is the retention time of a ‘non-sorbed’ component (air in this study),  $F_0$  (cm<sup>3</sup>/min) is the flow rate of gas carrier,  $W_p$  (g) is the mass of the polymer packed in the column, and  $T_{col}$  (K) is the column temperature,  $j$  is the pressure drop correction factor determined by

$$j = \frac{3 \left( \frac{P_{in}}{P_{out}} \right)^2 - 1}{2 \left( \frac{P_{in}}{P_{out}} \right)^3 - 1} \quad (2)$$

where  $P_{in}$  and  $P_{out}$  are the inlet and outlet pressures of the column, respectively.

Then, the value of various thermodynamic quantities can be obtained through  $V_g$ . Thus, infinite dilution activity coefficient  $\Omega_1^\infty$  can be determined by

$$\ln \Omega_1^\infty = \ln \left( \frac{273.2R}{V_g p_1^o M_1} \right) - \frac{p_1^o}{RT_{col}} (B_{11} - V_1) \quad (3)$$

where  $p_1^o$  (pa) is the vapor pressure of a solute at temperature  $T_{col}$ ,  $M_1$  (g/mol) is the solute molecular mass,

$B_{11}$  is the second virial coefficient, and  $V_1$  (cm<sup>3</sup>/mol) is the solute molar volume. The second term in the right of this equation is the correction for non-ideality of the solute.

Based on the activity coefficient, the partial molar excess free energy of mixture at infinite dilution,  $\Delta G_m$ , can be calculated by

$$\Delta G_m = RT \ln \Omega_1^\infty \quad (4)$$

The infinite dilution solubility coefficient,  $S$ , can be determined from the following equation by taking into account non-ideal gas behavior of vapor phase.

$$S = V_g \frac{\rho}{p_o} \exp \left[ (2B_{11} - V_1) j \frac{p_o}{RT} \right] \quad (5)$$

where  $p_o$  is the standard pressure (1 atm), and  $\rho$  (g/cm<sup>3</sup>) is the density of polymer at temperature  $T_{col}$ .

The Flory–Huggins interaction parameter at infinite dilution  $\chi_{12}^\infty$ , which was used as a measure of the strength of interaction, is a guide in the prediction of the compatibility between a polymer and a solvent. And it can be obtained by the following equation related to  $\Omega_1^\infty$

$$\chi_{12}^\infty = \ln \Omega_1^\infty - \left(1 - \frac{1}{r}\right) + \ln \frac{\rho_1}{\rho_2} \quad (6)$$

where  $r$  is the molar volume ratio of solute to polymer given by

$$r = \frac{\rho_1 M_2}{\rho_2 M_1} \quad (7)$$

where,  $\rho_1$  and  $\rho_2$  is the density of solute and polymer (g/cm<sup>3</sup>),  $M_1$  and  $M_2$  is the molecular weight of solute and polymer, respectively (g/mol).

## Part B: Calculation of diffusion properties

According to Van Deemter's model<sup>33</sup>, infinite dilution diffusion coefficient  $D^\infty$  is of the form

$$D^\infty = \frac{8d_p^2}{\pi^2 C} \left[ \frac{k}{(1+k)^2} \right] \quad (8)$$

where  $d_p$  (m) is the thickness of the polymer coated on the support material in the column,  $C$  is a parameter related to the column characteristics,  $k$  is the partition ratio given by

$$k = \frac{t_R - t_M}{t_M} \quad (9)$$

The thickness of the polymer coated on the support material  $d_p$  is calculated from the equation

$$d_p = \frac{W_p \rho_d d_d}{3\rho_p W_d} \quad (10)$$

where  $\rho_p$  and  $\rho_d$  are the density of the polymer and the support material ( $\text{g/cm}^3$ ),  $W_p$  is the mass of the polymer on the support material,  $W_d$  (g) and  $d_d$  (m) are the mass and the average diameter of the support material in the column, respectively.

From Plate theory<sup>33</sup>, the height equivalent to a theoretical plate  $H$  (m) is determined by

$$H = A + \frac{B}{u} + Cu = L/n \quad (11)$$

where  $u$  (m/s) is the linear velocity of carrier gas,  $L$  (m) is the length of column,  $A$ ,  $B$  and  $C$  are constants independent of carrier gas flow rate,  $n$  is the number of theoretical plate determined by

$$n = 5.54 \left( \frac{t_R}{W_{1/2}} \right)^2 \quad (12)$$

where  $W_{1/2}$  (min) is the full peak width at half-maximum.  $u$  is calculated by

$$u = j \frac{F_0}{a} \frac{T_{col}}{T_{flow}} \quad (13)$$

where  $T_{flow}$  (K) is the temperature of the flowmeter,  $a$  ( $\text{m}^3/\text{m}$ ) is the volume of gas-phase per unit length.

$C$  is derived from equation (11) in conjunction with equations (12) and (13). The term  $B/u$  becomes small and can be negligible in relation to  $A + Cu$  at sufficiently high flow rates. Then the plot of  $H$  vs.  $u$  yields a straight line with slope  $C$ .

## Tables

**Table S1** Parameters of the columns packed with the hybrid materials with various APTEOS contents

|                               | PVA                   | PA-2.5                | PA-5.0                | PA-7.5                | PA-10.0               |
|-------------------------------|-----------------------|-----------------------|-----------------------|-----------------------|-----------------------|
| $W_p$ (g)                     | 0.472                 | 0.397                 | 0.401                 | 0.431                 | 0.422                 |
| $d_p$ (m)                     | $4.36 \times 10^{-6}$ | $4.29 \times 10^{-6}$ | $4.24 \times 10^{-6}$ | $4.19 \times 10^{-6}$ | $4.16 \times 10^{-6}$ |
| $\rho_p$ (g/cm <sup>3</sup> ) | 1.325                 | 1.347                 | 1.361                 | 1.378                 | 1.391                 |

$W_p$  (g) is the mass of the polymer packed in the column,  $d_p$  (m) is the thickness of the polymer coated on the support material in the column,  $\rho_p$  is the density of the PVA hybrid materials (g/cm<sup>3</sup>).

## Figures

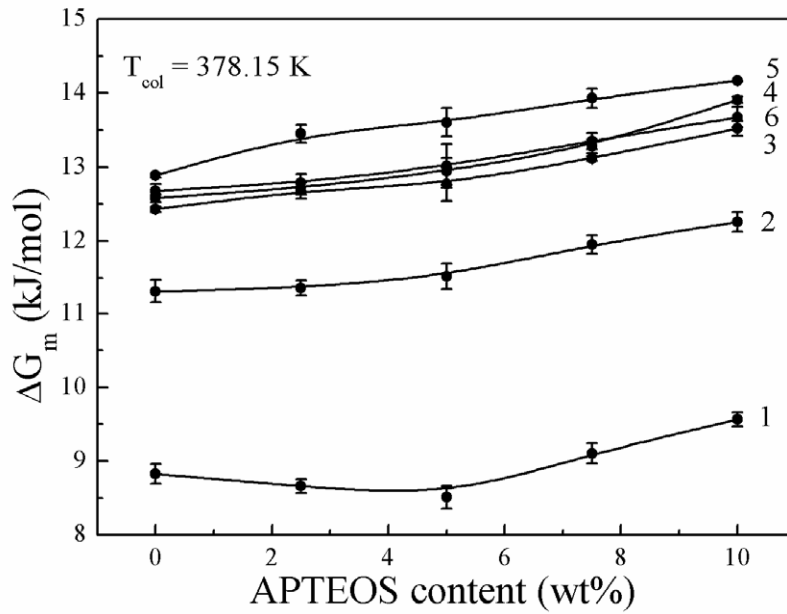

a

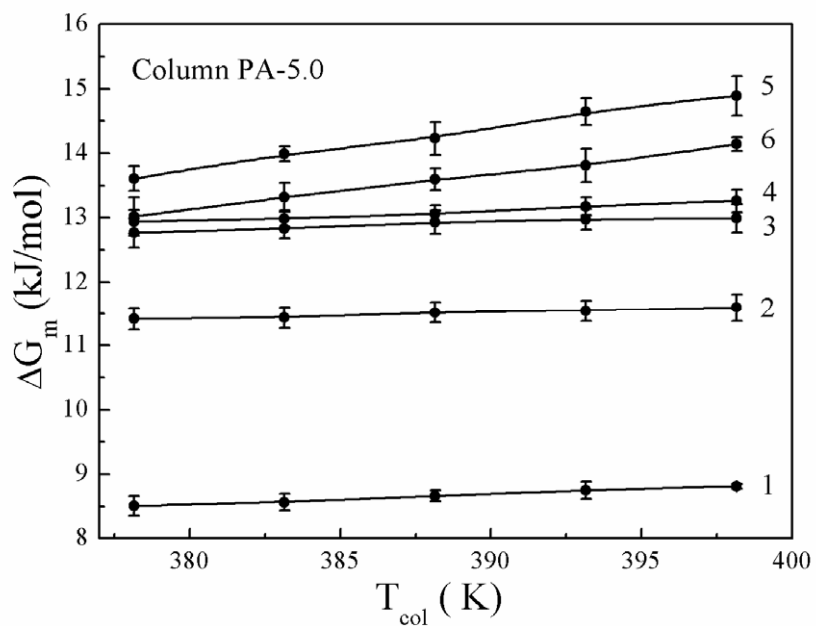

b

**Fig.S1** Effects of APTEOS content (a) and column temperature (b) on the partial molar excess free energy of mixture  $\Delta G_m$  of hybrid material-solvent (1 water; 2 methanol; 3 ethanol; 4 isopropanol; 5 cyclohexane; 6 benzene)

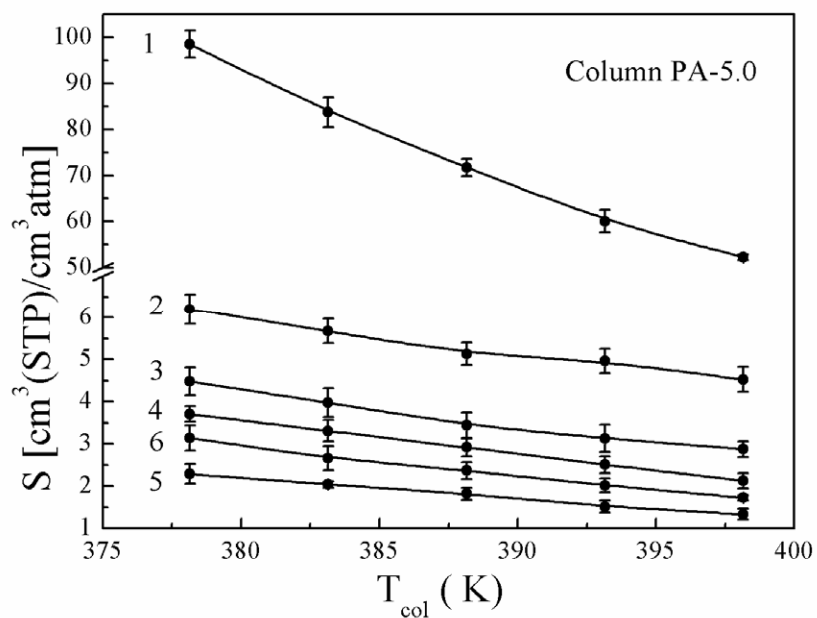

**Fig. S2** Temperature dependences of the solubility coefficients of solvents  $S$  in PA-5.0 (1 water; 2 methanol; 3 ethanol; 4 isopropanol; 5 cyclohexane; 6 benzene)

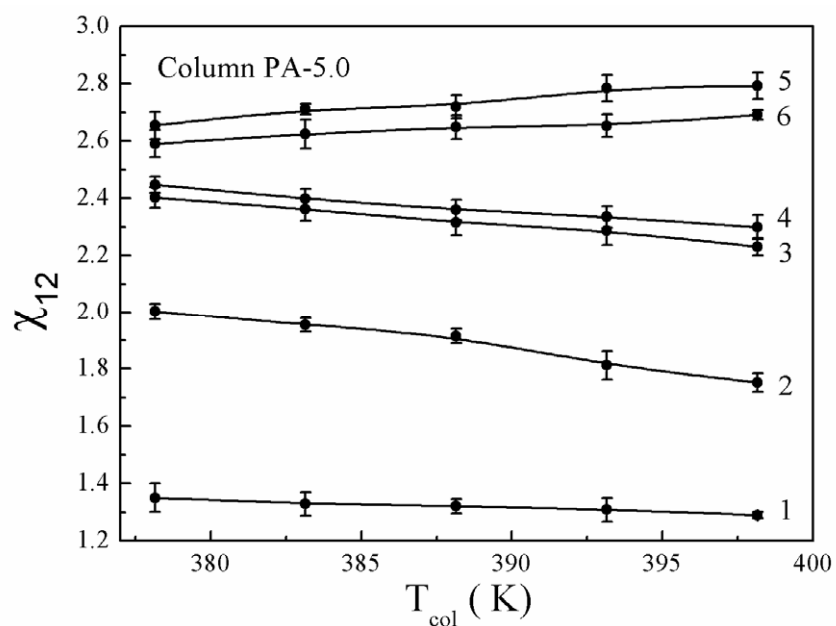

**Fig. S3** Temperature dependences of the interaction parameters of PA-5.0-solvent pairs  $\chi_{12}^{\infty}$  (1 water; 2 methanol; 3 ethanol; 4 isopropanol; 5 cyclohexane; 6 benzene)

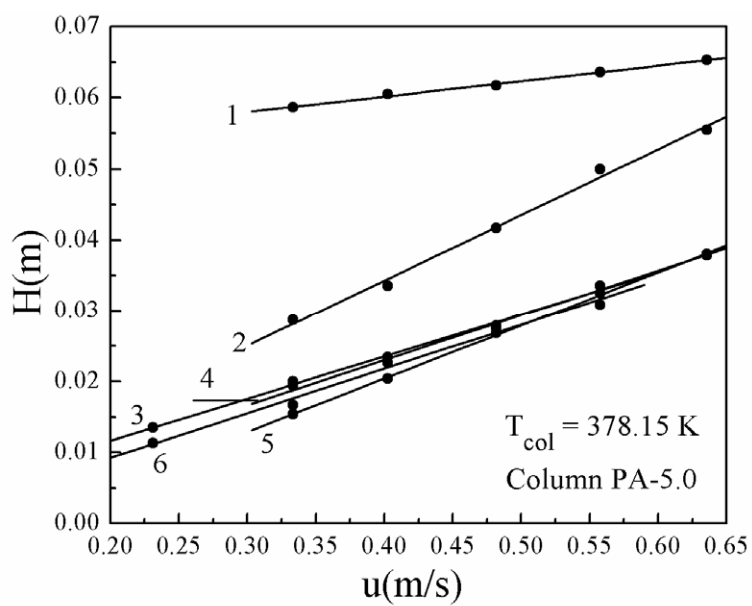

**Fig.S4** Relationship of the height equivalent to a theoretical plate  $H$  with the linear velocity of carrier gas  $u$  in column PA-5.0 at 378.15 K (1 water; 2 methanol; 3 ethanol; 4 isopropanol; 5 cyclohexane; 6 benzene)

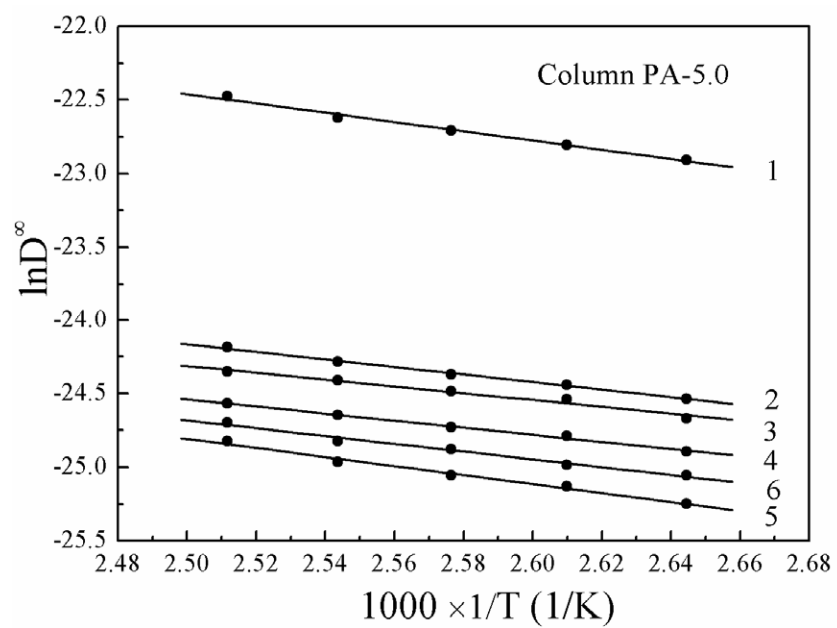

**Fig.S5** Arrhenius plots for the infinite dilution diffusion coefficients of solvents in the hybrid materials PA-5.0 (1 water; 2 methanol; 3 ethanol; 4 isopropanol; 5 cyclohexane; 6 benzene)
